# Supplementary material for: Ordered mesoporous electrocatalysts for highly selective formate production from electrocatalytic CO2 reduction
Source: Royal Society of Chemistry journal article supplement (doi:10.1039/d4ta08622h), 2025-01-01
Supplement: d4ta08622h1.pdf [file d4ta08622h1.pdf]

## Supporting Information for

### **Ordered Mesoporous Electrocatalysts for Highly Selective Formate Production from Electrocatalytic CO<sub>2</sub> Reduction**

Ashfaq Ahamd,<sup>1,#</sup> Chaoran Zhang,<sup>1,#</sup> Yichuan Gu, Qu Jiang,<sup>1</sup> Ziyang Sheng,<sup>1</sup> Ruohan  
Feng,<sup>1</sup> Sihong Wang,<sup>1</sup> Haoyue Zhang,<sup>1</sup> Qianqing Xu,<sup>1</sup> Zijian Yuan,<sup>1</sup> Fang Song<sup>1,\*</sup>

<sup>1</sup>State Key Laboratory of Metal Matrix Composites, School of Materials Science and  
Engineering, Shanghai Jiao Tong University, Shanghai 200240, China

<sup>#</sup>Ashfaq Ahamd and Chaoran Zhang contributed equally to this paper.

\* Corresponding authors: [songfang@sjtu.edu.cn](mailto:songfang@sjtu.edu.cn)

## Supplementary Figures

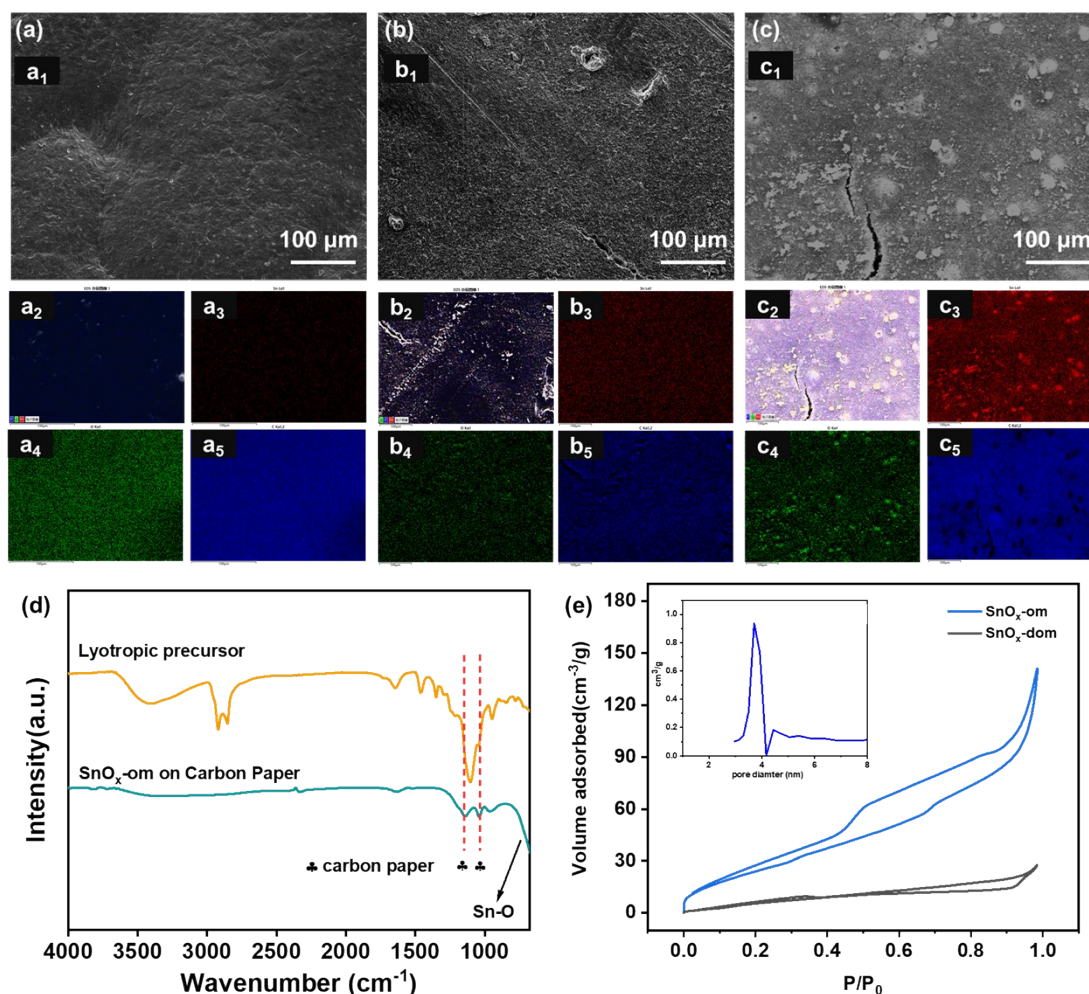

**Figure S1.** a, b, c) SEM images and elemental distributions of a) Brij 56 on carbon paper, b) lyotropic precursor on carbon paper, and c) as-deposited SnO<sub>x</sub>-om on carbon paper. c<sub>2</sub>, d<sub>2</sub> and e<sub>2</sub> are overlapped elemental distribution of Brij 56, lyotropic precursor and as-deposited SnO<sub>x</sub>-om. a<sub>3</sub>, b<sub>3</sub> and c<sub>3</sub> are Sn; a<sub>4</sub>, b<sub>4</sub> and c<sub>4</sub> are O; a<sub>5</sub>, b<sub>5</sub> and c<sub>5</sub> are C. a) Fourier-transformed infrared spectroscopy of lyotropic precursor (orange line) and SnO<sub>x</sub>-om after template removal (green line); b) Nitrogen adsorption-desorption isotherm of SnO<sub>x</sub>-om and SnO<sub>x</sub>-dom. Inset in b) shows the pore size distribution.

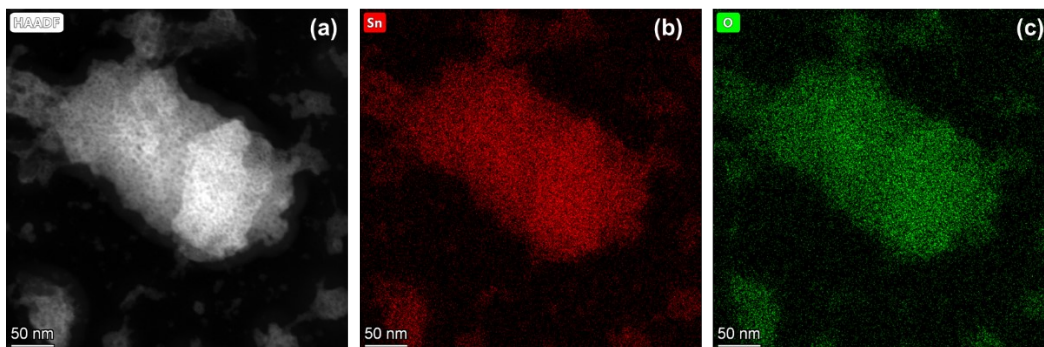

**Figure S2.** Elemental mapping of SnO<sub>x</sub>-om. a) HAADF image, b) Sn, and c) O distribution of SnO<sub>x</sub>-om. The spatial distributions of Sn and O in b, c) are depicted in red and green, respectively

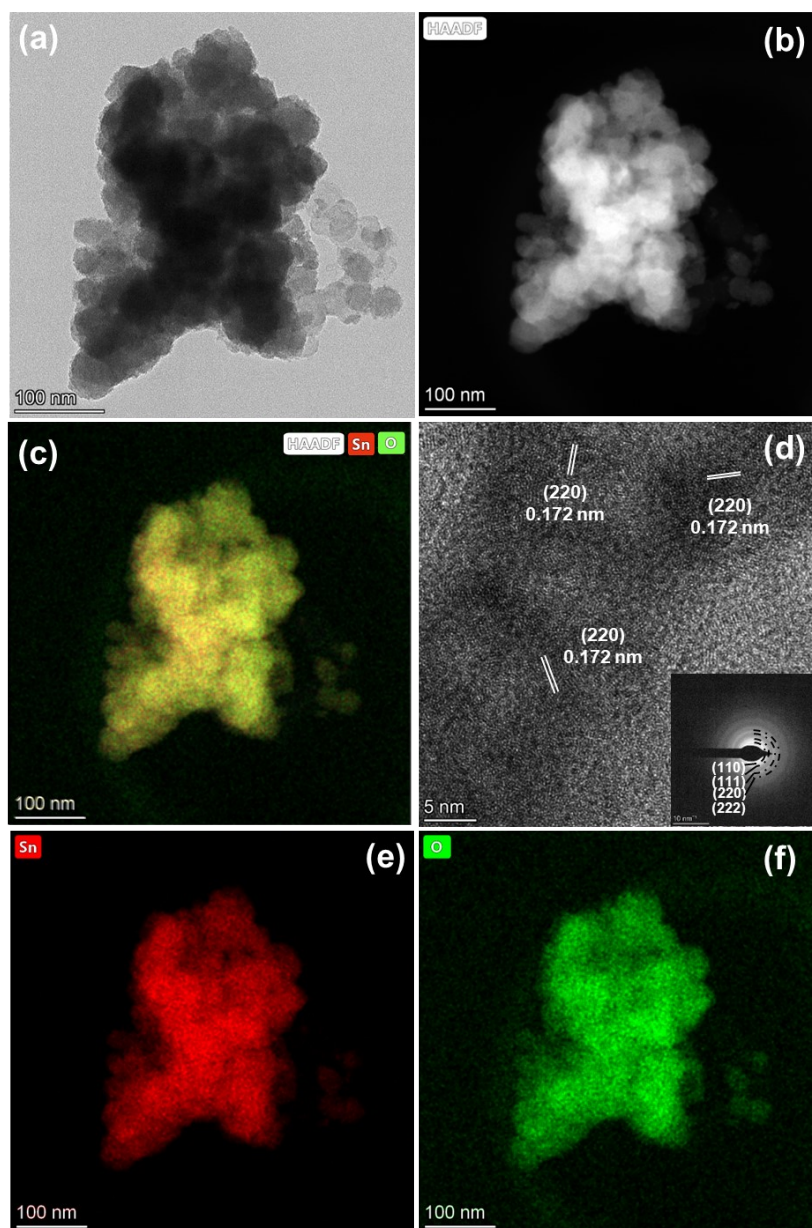

**Figure S3.** Microstructures of SnO<sub>x</sub>-dom. a) TEM image, b) HAADF image, c) EDS mapping, d) HRTEM image, e) Sn and f) O distribution of SnO<sub>x</sub>-dom. The inset in d) is the SAED pattern of the corresponding area. The spatial distributions of Sn and O in c, e, f) are depicted in red and green, respectively. The yellow coloration arises from the blending of these colors, indicating a homogeneous distribution of tin and oxygen.

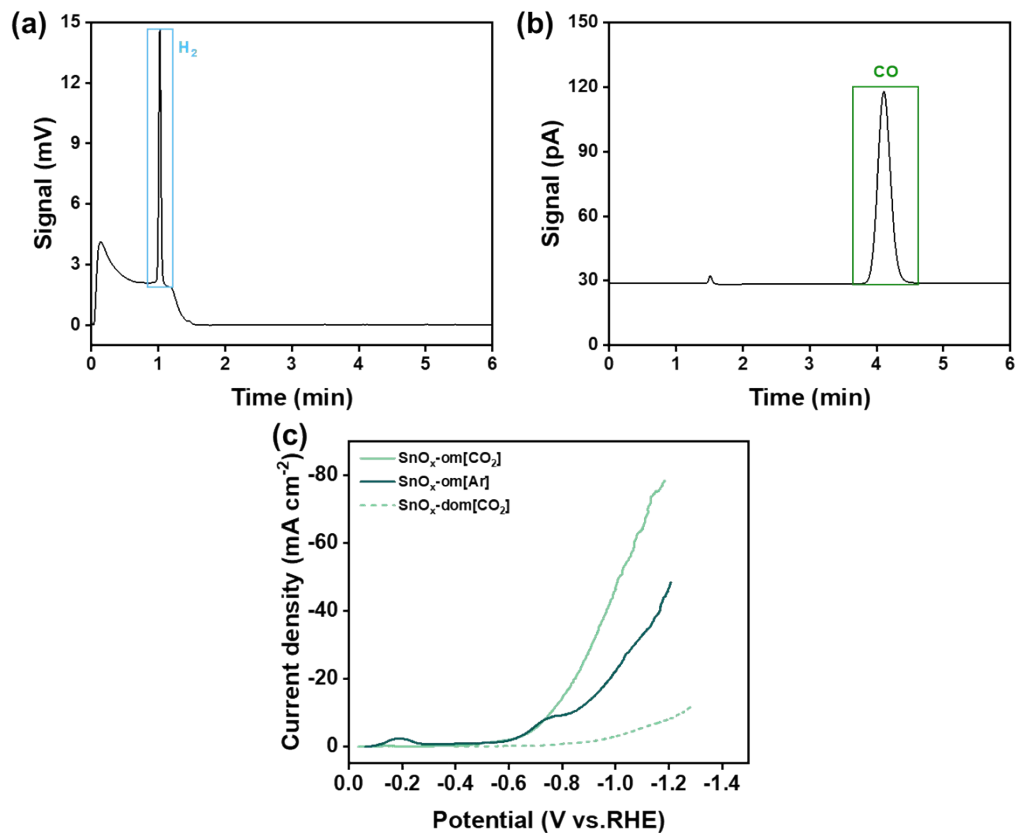

**Figure S4.** Gas chromatography data and electrochemical analysis for CO<sub>2</sub>RR. a) TCD signal curve for H<sub>2</sub>; b) FID signal curve for CO; c) LSV curves of SnO<sub>x</sub>-om under CO<sub>2</sub>-saturated and Ar-saturated 0.1 M KHCO<sub>3</sub> and SnO<sub>x</sub>-dom under CO<sub>2</sub>-saturated 0.1 M KHCO<sub>3</sub>.

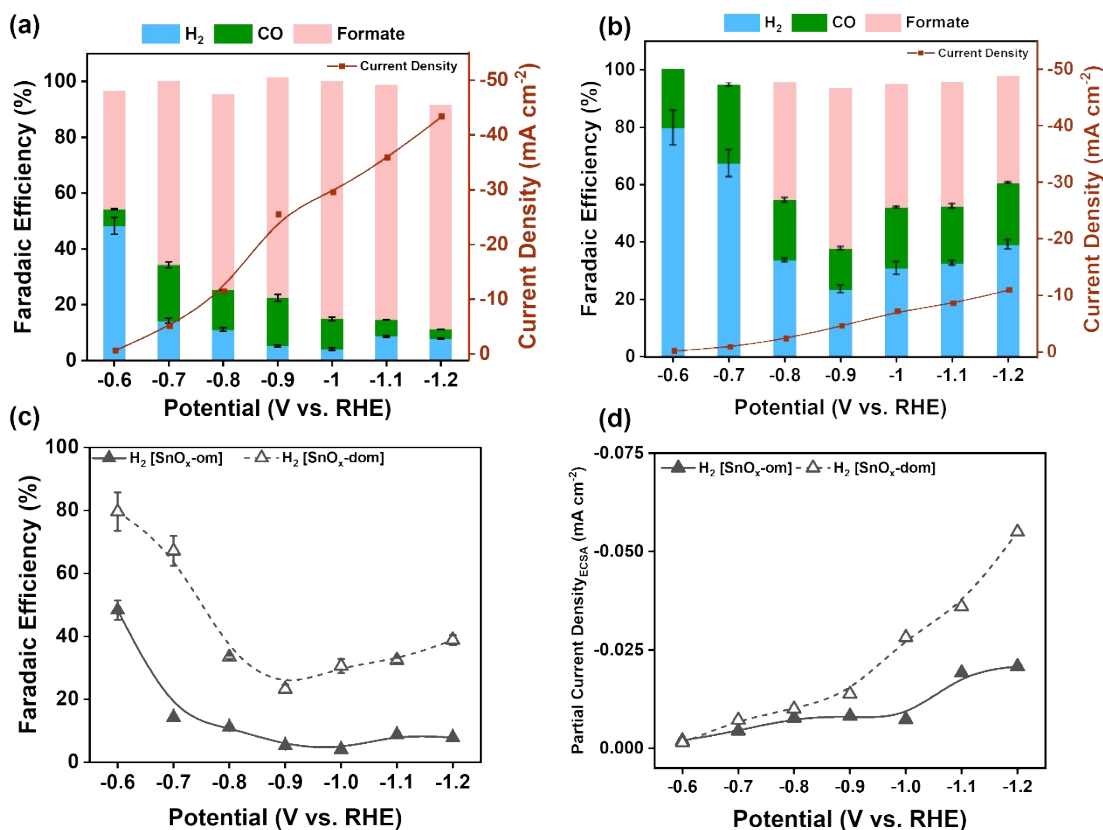

**Figure S5.** Total current density and Faradaic efficiency of the main CO<sub>2</sub>RR products of a) SnO<sub>x</sub>-om and b) SnO<sub>x</sub>-dom; c) Faradaic efficiency of H<sub>2</sub> plotting against applied potentials; ECSA-normalized H<sub>2</sub> partial current densities plotting against applied potentials.

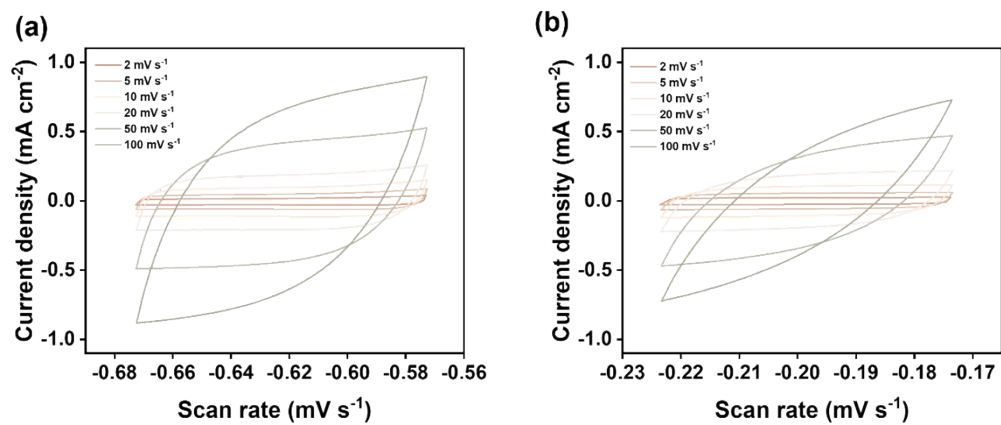

**Figure S6.** Double-layer cyclic voltammograms at scan rates ranging from 2 to 100 mV s<sup>-1</sup>. a) SnO<sub>x</sub>-om and b) SnO<sub>x</sub>-dom.



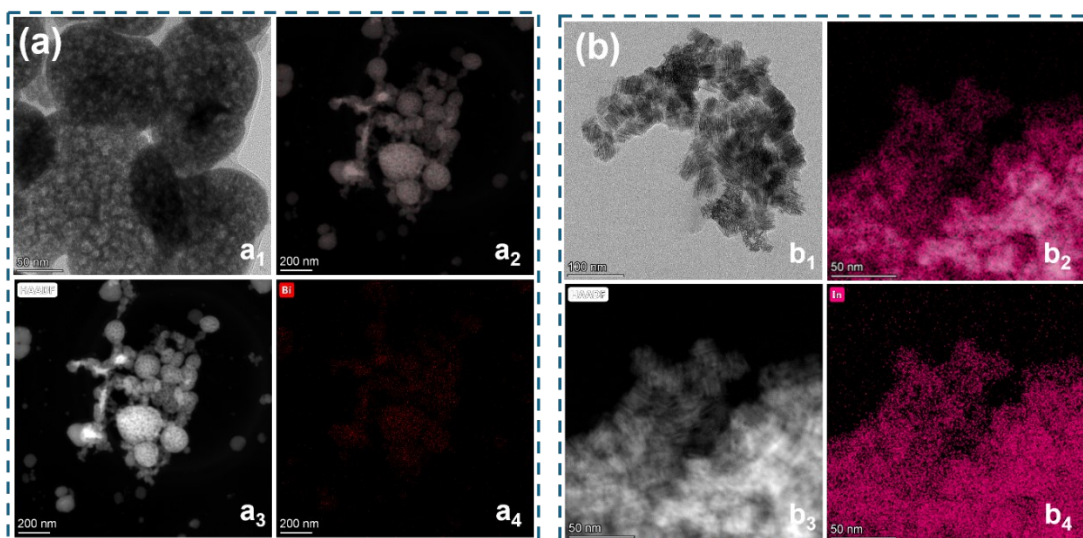

**Figure S7.** Microstructures of a)  $\text{BiO}_x\text{-om}$  and b)  $\text{InO}_x\text{-om}$ . a<sub>1</sub>) TEM image, a<sub>2</sub>) overlapped images of a<sub>3</sub>) and a<sub>4</sub>), a<sub>3</sub>) HAADF image and a<sub>4</sub>) elemental distribution of Bi of  $\text{BiO}_x\text{-om}$ ; b<sub>1</sub>) TEM image, b<sub>2</sub>) overlapped images of b<sub>3</sub>) and b<sub>4</sub>), b<sub>3</sub>) HAADF image and b<sub>4</sub>) elemental distribution of In of  $\text{InO}_x\text{-om}$ .



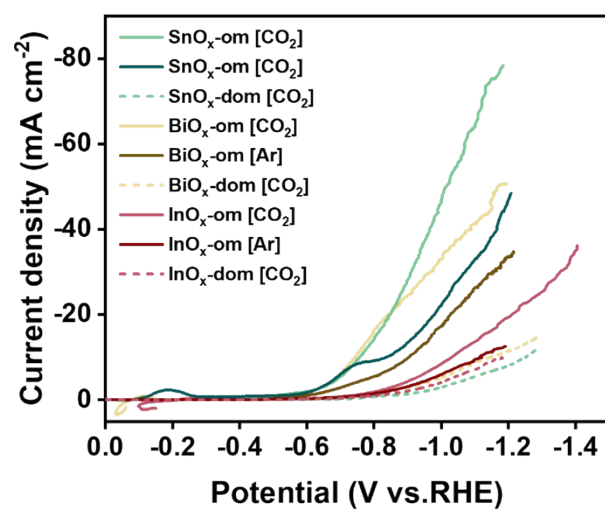

**Figure S8.** LSV curves of SnO<sub>x</sub>-om, BiO<sub>x</sub>-om, and InO<sub>x</sub>-om under Ar and CO<sub>2</sub>-saturated 0.1 M KHCO<sub>3</sub> and SnO<sub>x</sub>-dom, BiO<sub>x</sub>-dom, and InO<sub>x</sub>-dom under CO<sub>2</sub>-saturated 0.1 M KHCO<sub>3</sub>.

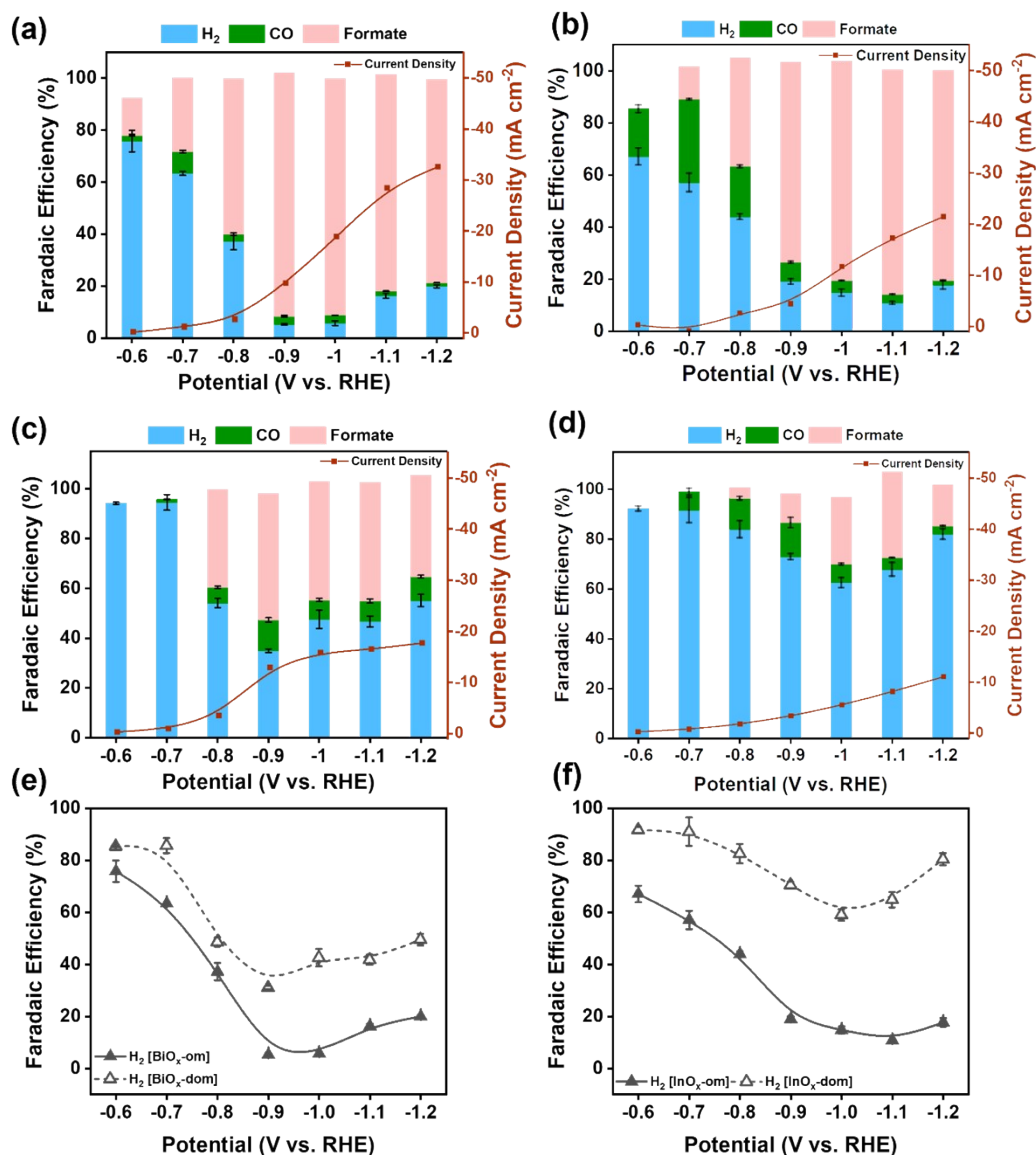

**Figure S9.** Total current density and Faradaic efficiency of the main CO<sub>2</sub>RR products of a) BiO<sub>x</sub>-om, b) BiO<sub>x</sub>-dom, c) InO<sub>x</sub>-om and d) InO<sub>x</sub>-dom; e) Faradaic efficiency of H<sub>2</sub> for BiO<sub>x</sub>-om and BiO<sub>x</sub>-dom plotting against applied potentials; f) Faradaic efficiency of H<sub>2</sub> for InO<sub>x</sub>-om and InO<sub>x</sub>-dom plotting against applied potentials.

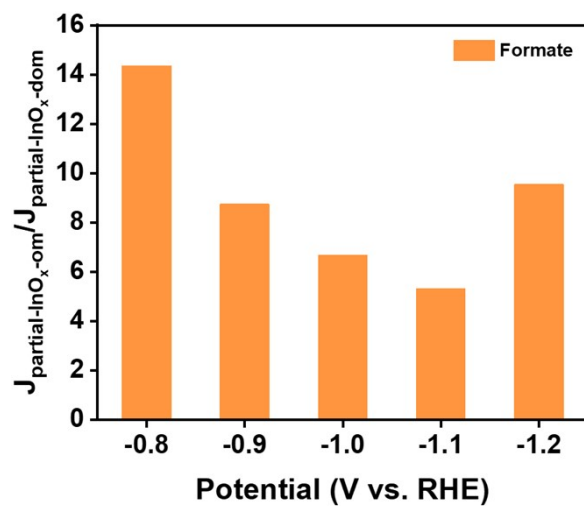

**Figure S10.** The partial current density ratio of ordered and disordered mesoporous catalysts plotting against applied potentials for InO<sub>x</sub>.

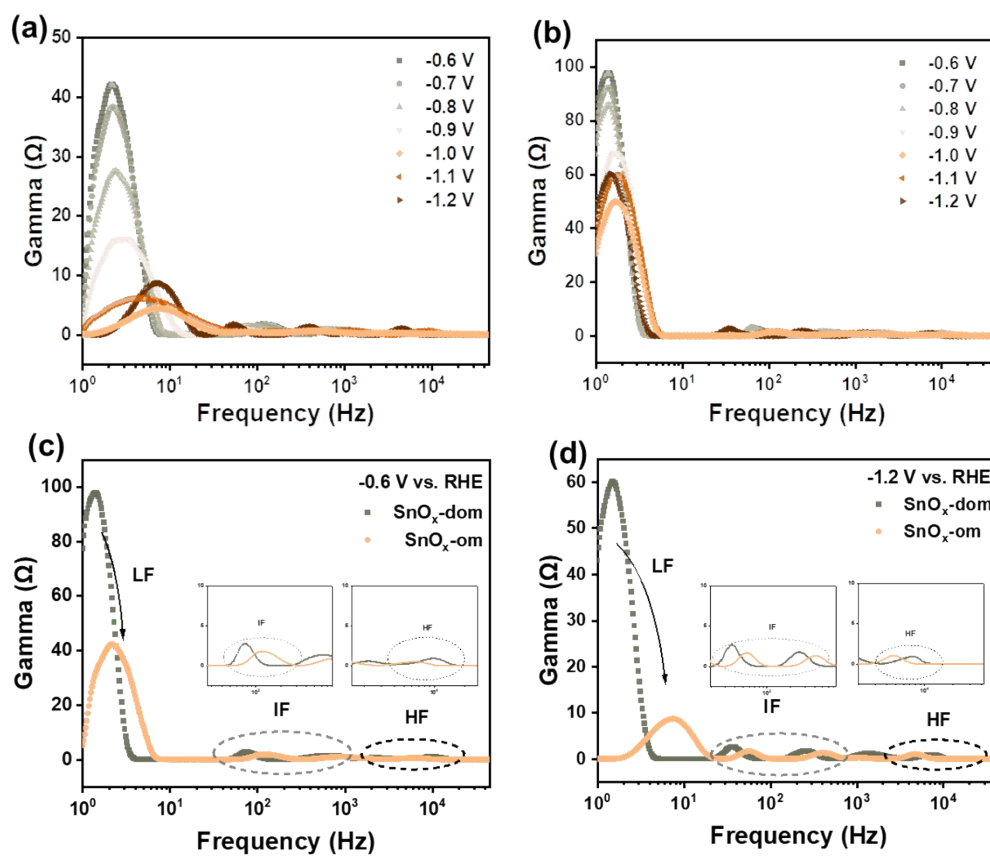

**Figure S11.** a, b) DRT results at potentials ranging from -0.6V to -1.2 V vs. RHE for a) SnO<sub>x</sub>-om and b) SnO<sub>x</sub>-dom; c, d) DRT results for electrochemical impedance at a) -0.6 V vs. RHE and b) -1.2 V vs. RHE; Inset in c) and d) is the enlarged view of IF and HF region.

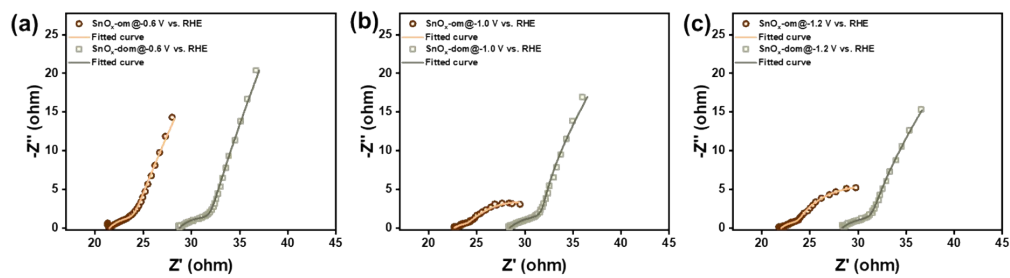

**Figure S12.** Electrochemical impedance spectra analysis. Nyquist plots and fitting results for electrochemical impedance at a) -0.6 V vs. RHE, b) -1.0 V vs. RHE, and c) -1.2 V vs. RHE.

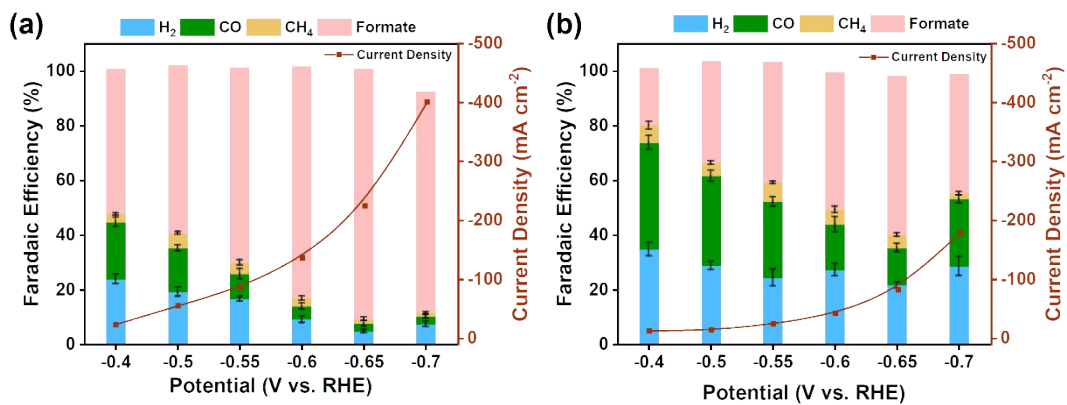

**Figure S13.** Total current density and Faradaic efficiency of the main CO<sub>2</sub>RR products in a flow cell for a) SnO<sub>x</sub>-om, b) SnO<sub>x</sub>-dom.

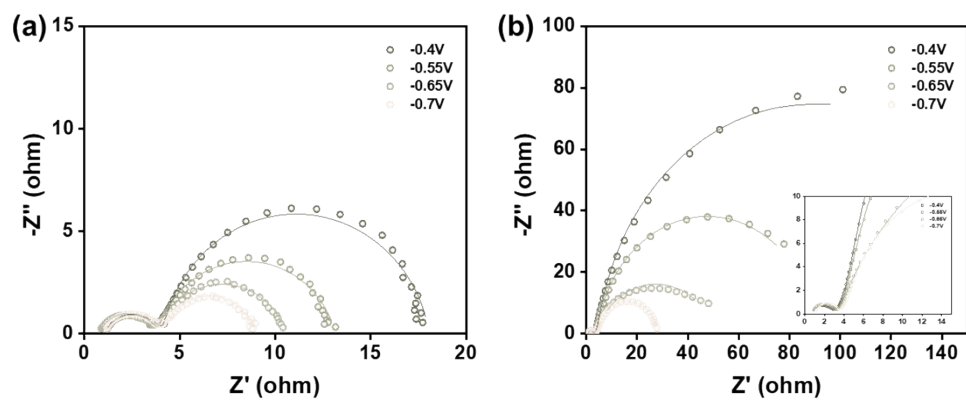

**Figure S14.** Electrochemical impedance spectra analysis. a, b) Nyquist plots of a)  $\text{SnO}_x\text{-om}$  and b)  $\text{SnO}_x\text{-dom}$ . Inset in b) shows the high-frequency region.



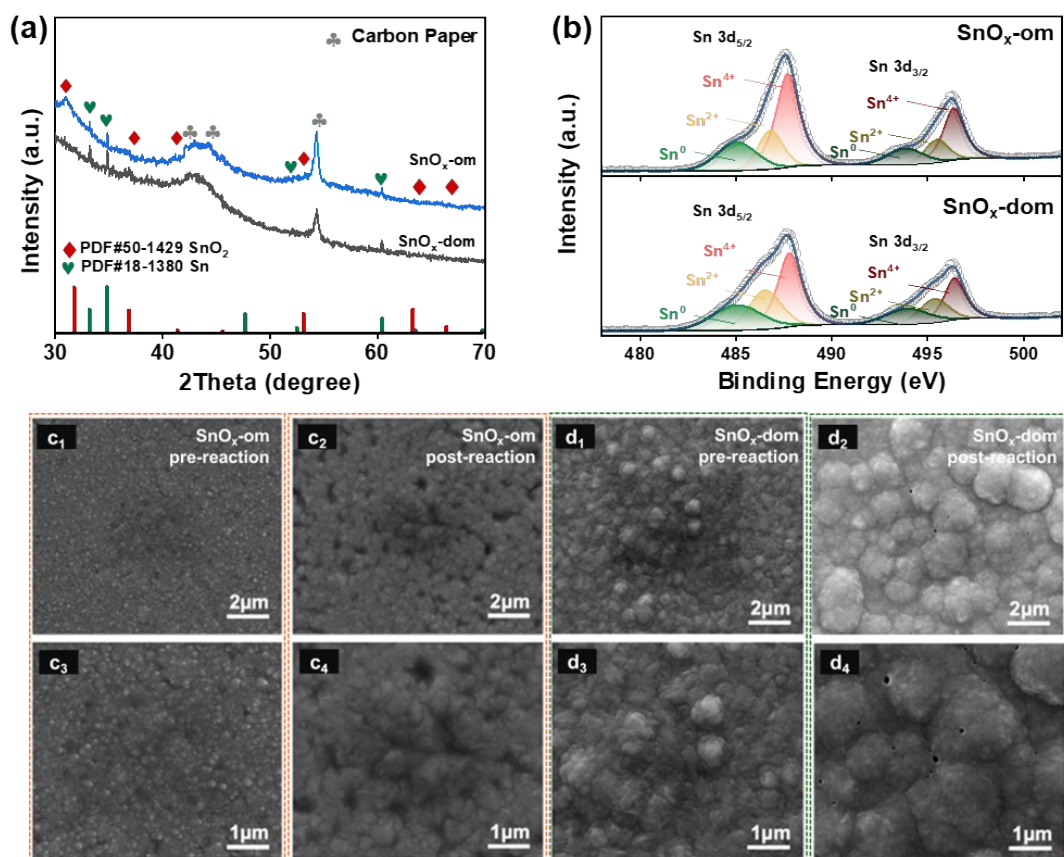

**Figure S15.** Microstructures of mesoporous catalysts after stability test. a) XRD patterns after the stability test; b) XPS after the stability test; c, d) SEM images before and after stability tests for c) SnO<sub>x</sub>-om and d) SnO<sub>x</sub>-dom.

**Table S1.** The gas chromatography data of SnO<sub>x</sub>-om.

| Potential<br>(vs. RHE) | H <sub>2</sub> (ppm) |          |          | CO (ppm) |          |          |
|------------------------|----------------------|----------|----------|----------|----------|----------|
|                        | 1                    | 2        | 3        | 1        | 2        | 3        |
| -0.6                   | 410.4986             | 423.2332 | 374.2128 | 51.51025 | 49.88418 | 47.11745 |
| -0.7                   | 870.654              | 980.2331 | 907.7123 | 1322.022 | 1225.406 | 1360.195 |
| -0.8                   | 1703.888             | 1579.973 | 1513.8   | 2015.761 | 2060.379 | 2045.853 |
| -0.9                   | 1728.534             | 1817.045 | 1557.446 | 5305.485 | 6021.106 | 5350.31  |
| -1.0                   | 1328.856             | 1646.866 | 1582.73  | 3852.103 | 4356.4   | 4032.958 |
| -1.1                   | 3933.039             | 3879.763 | 4145.394 | 2655.824 | 2638.934 | 2600.314 |
| -1.2                   | 4391.534             | 4423.283 | 4144.134 | 1789.989 | 1889.228 | 1827.147 |

**Table S2.** The gas chromatography data of SnO<sub>x</sub>-dom

| Potential<br>(vs. RHE) | H <sub>2</sub> (ppm) |          |          | CO (ppm) |          |          |
|------------------------|----------------------|----------|----------|----------|----------|----------|
|                        | 1                    | 2        | 3        | 1        | 2        | 3        |
| -0.6                   | 132.0913             | 147.1723 | -        | 35.95701 | -        | -        |
| -0.7                   | 651.7613             | 728.7713 | 745.1648 | 294.8343 | 287.7133 | 284.5758 |
| -0.8                   | 975.2981             | 1008.393 | 981.4367 | 593.5576 | 625.9393 | 637.6621 |
| -0.9                   | 1448.791             | 1331.761 | 1300.989 | 794.8067 | 835.77   | 854.4894 |
| -1.0                   | 2991.337             | 2585.978 | 2760.33  | 1929.972 | 1898.357 | 1943.584 |
| -1.1                   | 3472.943             | 3641.785 | 3526.372 | 2074.252 | 2241.889 | 2137.805 |
| -1.2                   | 5282.894             | 5305.547 | 5673.569 | 3022.337 | 2964.336 | 3006.949 |

**Table S3.** The gas chromatography data of BiO<sub>x</sub>-om

| Potential<br>(vs. RHE) | H <sub>2</sub> (ppm) |          |          | CO (ppm) |          |          |
|------------------------|----------------------|----------|----------|----------|----------|----------|
|                        | 1                    | 2        | 3        | 1        | 2        | 3        |
| -0.6                   | 162.0153             | 145.2543 | 154.4082 | 4.104882 | 4.406887 | 5.374828 |
| -0.7                   | 1002.614             | 990.2161 | 980.0763 | 138.8366 | 129.4233 | 123.3744 |
| -0.8                   | 1133.579             | 1321.47  | 1331.672 | 75.64551 | 98.49735 | 108.8134 |
| -0.9                   | 611.7689             | 678.5079 | 669.9295 | 347.6604 | 421.4752 | 393.5863 |
| -1.0                   | 1356.677             | 1196.667 | 1585.798 | 742.0344 | 728.9373 | 734.3881 |
| -1.1                   | 5713.131             | 6219.818 | 5600.238 | 616.1124 | 688.5852 | 643.4021 |
| -1.2                   | 8085.426             | 8147.505 | 8529.902 | 557.5079 | 562.6295 | 564.5626 |

**Table S4.** The gas chromatography data of BiO<sub>x</sub>-dom

| Potential<br>(vs. RHE) | H <sub>2</sub> (ppm) |          |          | CO (ppm) |          |          |
|------------------------|----------------------|----------|----------|----------|----------|----------|
|                        | 1                    | 2        | 3        | 1        | 2        | 3        |
| -0.6                   | 356.7413             | 354.2705 | 356.8179 | -        | -        | -        |
| -0.7                   | 1075.376             | 1133.908 | 1066.697 | 11.93789 | -        | 14.84596 |
| -0.8                   | 2382.19              | 2529.145 | 2385.458 | 260.4907 | 294.6776 | 295.1456 |
| -0.9                   | 5818.903             | 5578.515 | 5751.343 | 1878.21  | 2064.003 | 2145.855 |
| -1.0                   | 8683.678             | 9901.687 | 9994.554 | 1414.243 | 1616.967 | 1650.811 |
| -1.1                   | 9308.513             | 10205.25 | 9737.453 | 1536.814 | 1791.322 | 1839.224 |
| -1.2                   | 11772.35             | 12804.73 | 12552.29 | 2027.655 | 2245.832 | 2208.754 |

**Table S5.** The gas chromatography data of InO<sub>x</sub>-om

| Potential<br>(vs. RHE) | H <sub>2</sub> (ppm) |          |          | CO (ppm) |          |          |
|------------------------|----------------------|----------|----------|----------|----------|----------|
|                        | 1                    | 2        | 3        | 1        | 2        | 3        |
| -0.6                   | 227.4846             | 249.5156 | 244.6479 | 71.71309 | 62.03641 | 63.26746 |
| -0.7                   | 669.0545             | 591.8012 | 621.2782 | 347.869  | 350.3255 | 355.1954 |
| -0.8                   | 1412.272             | 1438.197 | 1484.665 | 617.8836 | 635.5866 | 652.8171 |
| -0.9                   | 1125.982             | 1022.61  | 1027.529 | 393.9492 | 409.4281 | 432.2904 |
| -1.0                   | 2407.886             | 2011.326 | 2156.89  | 694.7046 | 683.5001 | 689.5737 |
| -1.1                   | 2309.053             | 2502.21  | 2298.238 | 678.8895 | 762.939  | 716.3304 |
| -1.2                   | 5144.248             | 4993.594 | 4314.492 | 520.3139 | 512.2307 | 437.4516 |

**Table S6.** The gas chromatography data of InO<sub>x</sub>-dom

| Potential<br>(vs. RHE) | H <sub>2</sub> (ppm) |          |          | CO (ppm) |          |          |
|------------------------|----------------------|----------|----------|----------|----------|----------|
|                        | 1                    | 2        | 3        | 1        | 2        | 3        |
| -0.6                   | 300.1111             | 306.6819 | 303.9406 | -        | -        | -        |
| -0.7                   | 912.1569             | 829.8843 | 832.0333 | 54.44146 | 74.63163 | 79.10253 |
| -0.8                   | 1784.603             | 1931.889 | 1835.664 | 266.5382 | 293.0515 | 262.5404 |
| -0.9                   | 3077.685             | 3026.577 | 3128.388 | 624.0646 | 470.2793 | 622.9273 |
| -1.0                   | 4196.402             | 4458.766 | 4404.096 | 493.6665 | 513.0634 | 541.7127 |
| -1.1                   | 6843.008             | 7330.356 | 6846.629 | 484.185  | 476.3759 | 480.6089 |
| -1.2                   | 11291.5              | 11832.03 | 11336.4  | 435.1092 | 488.9776 | 459.1055 |

**Table S7.** Typical fitting results of Nyquist plots of SnO<sub>x</sub>-om and SnO<sub>x</sub>-dom in H-cell.

|                             | $R_{\Omega}$ | $C_{dl}$ | $R_p$ | $C_{\phi}$ | $R_s$   |
|-----------------------------|--------------|----------|-------|------------|---------|
| SnO <sub>x</sub> -om@-0.6V  | 21.48        | 6.704E-3 | 4.299 | 6.700eE-3  | 43.92E6 |
| SnO <sub>x</sub> -dom@-0.6V | 28.76        | 4.222E-3 | 4.497 | 6.460E-3   | 19.88E6 |
| SnO <sub>x</sub> -om@-1.0V  | 22.60        | 18.90E-3 | 2.881 | 9.550E-3   | 11.70   |
| SnO <sub>x</sub> -dom@-1.0V | 28.36        | 10.07E-3 | 6.051 | 4.632E-3   | 45.05E6 |
| SnO <sub>x</sub> -om@-1.2V  | 21.97        | 16.17E-3 | 3.610 | 6.059E-3   | 16.00   |
| SnO <sub>x</sub> -dom@-1.2V | 28.33        | 10.42E-3 | 5.276 | 6.095E-3   | 14.88E6 |

**Table S8.** Typical fitting results of Nyquist plots of SnO<sub>x</sub>-om and SnO<sub>x</sub>-dom in flow cell.

|                              | <b>R<sub>Ω</sub></b> | <b>C<sub>dl</sub></b> | <b>R<sub>p</sub></b> | <b>C<sub>o</sub></b> | <b>R<sub>s</sub></b> |
|------------------------------|----------------------|-----------------------|----------------------|----------------------|----------------------|
| SnO <sub>x</sub> -om@-0.65V  | 6.510                | 10.85E-6              | 23.11                | 8.826E-3             | 13.05                |
| SnO <sub>x</sub> -dom@-0.65V | 7.270                | 18.83e-6              | 30.89                | 79.66                | 150.7                |

**Table S9.** Comparisons of the catalytical performance towards formate using Sn-based materials.

| Catalyst                                               | FE <sub>formate</sub><br>(%) | J <sub>formate</sub><br>(mA cm <sup>-2</sup> ) | Applied potential<br>(V vs. RHE) | Stability<br>(h) | Cell type        | Electrolyte                   | Ref.            |
|--------------------------------------------------------|------------------------------|------------------------------------------------|----------------------------------|------------------|------------------|-------------------------------|-----------------|
| SnO/Cu <sub>x</sub> O/CF                               | 70                           | -1152                                          | -1.2                             | 21               | Flow cell        | 1 M KOH                       | 1               |
| Cu-SnO <sub>2</sub>                                    | 81                           | -405                                           | -                                | 0.8              | Flow cell        | 1 M KOH                       | 2               |
|                                                        | 80                           | -160                                           | -                                | 5                |                  |                               |                 |
| SnO <sub>2</sub> -1                                    | 80                           | -160                                           | -0.9                             | 6                | Flow cell        | 1 M KOH                       | 3               |
| Stanene                                                | 93                           | -7                                             | -0.93                            | 60               | H cell           | 0.1 M KHCO <sub>3</sub>       | 4               |
| Sn-SnS <sub>x</sub>                                    | 93.3                         | -18.6                                          | -1.2                             | 36               | H cell           | 0.1 M KHCO <sub>3</sub>       | 5               |
| R-CuSnO <sub>3</sub>                                   | 93.4                         | -23.9                                          | -0.9                             | -                | H cell           | 0.5 M KHCO <sub>3</sub>       | 6               |
|                                                        | 90                           | ~90                                            | -                                | 90               | Flow cell        | 1 M KOH                       |                 |
| PPIL <sup>4</sup><br>-Sn <sub>5</sub> Ag <sub>5</sub>  | 91                           | ~90                                            | -0.75 to -1.0                    | 30               | Flow cell        | 1 M KOH                       | 7               |
| Sn <sub>3</sub> O(OH) <sub>2</sub> Cl <sub>2</sub>     | 90                           | -29                                            | -0.9                             | 35               | H cell           | 0.5 M KHCO <sub>3</sub>       | 8               |
|                                                        | ~90                          | -165                                           | -0.9                             | 40               | Flow cell        | 1 M KOH                       |                 |
| Sn(SnO <sub>2</sub> ) <sub>15</sub> -CN <sub>x</sub>   | 82.5                         | -16.7                                          | -0.78                            | 2                | H cell           | 0.5 M KHCO <sub>3</sub>       | 9               |
| 5%Cu-SnO <sub>2</sub>                                  | 91                           | -22                                            | -0.9                             | 12               | H cell           | 0.5 M KHCO <sub>3</sub>       | 10              |
|                                                        | 92                           | ~110.4                                         | -0.9                             | 14               | Flow cell        | 1 M KOH                       |                 |
| SnS <sub>2</sub> @SnO <sub>2</sub>                     | 92.2                         | ~184.4                                         | -0.86                            | 20               | Flow cell        | 1 M KOH                       | 11              |
| Cu@Cu-SnS <sub>2</sub>                                 | 93                           | -35                                            | -1.0                             | 10               | H cell           | 0.5 M KHCO <sub>3</sub>       | 12              |
| Dual-phase Cu                                          | 93                           | ~50                                            | -1.4                             | 10               | H cell           | 0.5 M KHCO <sub>3</sub>       | 13              |
| SnO <sub>2</sub> /Cu <sub>6</sub> Sn <sub>5</sub> /CuO | 90.13                        | -25.2                                          | -0.95                            | 45               | H cell           | 0.5 M NaHCO <sub>3</sub>      | 14              |
|                                                        | 95.64                        | -70                                            | -0.95                            | 25               | Flow cell        | 1 M KOH                       |                 |
| <b>SnO<sub>x</sub>-om</b>                              | <b>85</b>                    | <b>-25.11</b>                                  | <b>-1.0</b>                      | <b>-</b>         | <b>H cell</b>    | <b>0.1 M KHCO<sub>3</sub></b> | <b>Our work</b> |
|                                                        | <b>91</b>                    | <b>-205.5</b>                                  | <b>-0.65</b>                     | <b>22</b>        | <b>Flow cell</b> | <b>1 M KOH</b>                |                 |

## Supplementary Note 1

The Pourbaix diagram in [Figure 5b](#) depicts the dependence of the proton available on the thermodynamics of the CO<sub>2</sub> electroreduction process for the production of formate/formic acid, CH<sub>4</sub>, and CH<sub>3</sub>OH. It is visualized by plotting the standard potential of the reactant–product couple to the pH, which is calculated according to the Nernst equation<sup>15–17</sup>. For reactions involving proton-coupled electron transfer, E~pH lines are parallel and have a slope of 59.2 mV pH<sup>-1</sup>. Differently, the E~pH line for CO<sub>2</sub>RR to formic acid (or formate) consists of two segments, one with a slope of 59.2 mV pH<sup>-1</sup> for the production of formic acid at pH < 3.75 (Reaction 1) and the other with a slope of 29.6 mV pH<sup>-1</sup> for the production of formate at pH > 3.75 (Reaction 2 and 3).

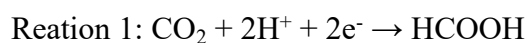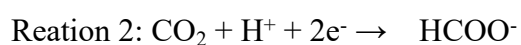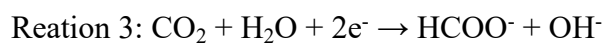

Although the generation of formic acid in an acidic environment is thermodynamically unfavorably, the deprotonation at high pH significantly improves the feasibility of the reaction.



## Supplementary Note 2

Before we tested products, we bubbled standard gas with a known concentration of components to calibrate the peak area and get the peak area for certain products, namely  $S_0\text{-H}_2$  or  $S_0\text{-CO}$ . According to Lange's Handbook of Chemistry, the solubility of typical products during the  $\text{CO}_2\text{RR}$  is 3.8 mM for  $\text{H}_2$ , 0.5 mM for  $\text{CO}$ , and the solubility of  $\text{CO}_2$  is 33 mM. According to the peak integration of tested ones (one example is shown in [Figure S4a and S4b](#)), we gained a value of peak area for the generated certain products, namely  $S_i\text{-H}_2$  or  $S_i\text{-CO}$ . Then we are able to use the ratio of  $S_i\text{-H}_2$  to  $S_0\text{-H}_2$  to know the detailed concentration of target products, namely  $x_i$ . For every single data point, we calculated the average value of three sampling points to ensure the accuracy of statistics. The corresponding analysis method refers to several related literatures <sup>18-20</sup>.

## References

- 1 T. Liu, K. Ohashi, K. Nagita, T. Harada, S. Nakanishi and K. Kamiya, *Small*, 2022, **18**, 2205323.
- 2 Y. Jiang, J. Shan, P. Wang, L. Huang, Y. Zheng and S.-Z. Qiao, *ACS Catal.*, 2023, **13**, 3101–3108.
- 3 Z. Liu, J. Chen, H. Guo and X. Huang, *Nano Energy*, 2023, **108**, 108193.
- 4 X. Mei, C. Liu, D. Zhang, J. Cao, R. Ge, J. Wang and W. Xu, *Advanced Energy Materials*, 2024, **14**, 2303889.
- 5 C. Chen, S. Shen, J. Wang, Y. Liu, X. Guo, L. Zhang and J. Li, *Green Chem.*, 2024, **26**, 9888–9898.
- 6 T. Fan, J. Zhang, X. Zhang, M. Wang, X. Yi, Y. Lum and Z. Chen, *Nano Energy*, 2024, **130**, 110135.
- 7 X.-Q. Duan, G.-Y. Duan, Y.-F. Wang, X.-Q. Li, R. Wang, R. Zhang and B.-H. Xu, *Small*, 2023, **19**, 2207219.
- 8 T. Wang, J. Chen, X. Ren, J. Zhang, J. Ding, Y. Liu, K. H. Lim, J. Wang, X. Li, H. Yang, Y. Huang, S. Kawi and B. Liu, *Angewandte Chemie International Edition*, 2023, **62**, e202211174.
- 9 R. Samanta, M. Kempasiddaiah, R. K. Trivedi, B. Chakraborty and S. Barman, *ACS Appl. Energy Mater.*, 2024, **7**, 5359–5370.
- 10 B. Li, J. Chen, L. Wang, D. Xia, S. Mao, L. Xi, S. Ying, H. Zhang and Y. Wang, *Applied Catalysis B: Environment and Energy*, 2025, **363**, 124784.
- 11 Z. Liu, C. Liu, S. Mao and X. Huang, *ACS Appl. Mater. Interfaces*, 2023, **15**, 7529–7537.
- 12 Y. Fu, B. Zeng, X. Wang, L. Lai, Q. Wu and K. Leng, *Chemistry – A European Journal*, 2024, **30**, e202402301.
- 13 W. Cheng, X. Xu, Q. Liao, G. Yao, C. Zhang and H. Li, *Chemical Engineering Journal*, 2024, **480**, 147922.
- 14 Y. Shi, Y. Wang, J. Yu, Y. Chen, C. Fang, D. Jiang, Q. Zhang, L. Gu, X. Yu, X. Li, H. Liu and W. Zhou, *Advanced Energy Materials*, 2023, **13**, 2203506.
- 15 R. Francke, B. Schille and M. Roemelt, *Chem. Rev.*, 2018, **118**, 4631–4701.
- 16 N. Han, P. Ding, L. He, Y. Li and Y. Li, *Advanced Energy Materials*, 2020, **10**, 1902338.
- 17 C. Costentin, S. Drouet, G. Passard, M. Robert and J.-M. Savéant, *J. Am. Chem. Soc.*, 2013, **135**, 9023–9031.
- 18 J. Gu, F. Héroguel, J. Luterbacher and X. Hu, *Angewandte Chemie International Edition*, 2018, **57**, 2943–2947.
- 19 Z.-Z. Niu, L.-P. Chi, R. Liu, Z. Chen and M.-R. Gao, *Energy Environ. Sci.*, 2021, **14**, 4169–4176.
- 20 N. Dutta, D. Bagchi, G. Chawla and S. C. Peter, *ACS Energy Lett.*, 2024, **9**, 323–328.
